# Supplementary material for: Electrochemical Detection of Plasma Immunoglobulin as a Biomarker for Alzheimer’s Disease
Source: MDPI journal article supplement (doi:10.3390/s17112464), 2017-10-27
Supplement: s1 [file s1]

# Electrochemical Detection of Plasma Immunoglobulin as a Biomarker for Alzheimer's Disease

Goulielmos-Zois Garyfallou <sup>1</sup>, Orlando Ketebu <sup>1</sup>, Samet Şahin <sup>1,2</sup>,  
 Elizabeta B. Mukaetova-Ladinska <sup>3</sup>, Michael Catt <sup>4</sup> and Eileen Hao Yu <sup>1,\*</sup>

<sup>1</sup> School of Chemical Engineering and Advance Materials, Newcastle University, Newcastle upon Tyne NE1 7RU, UK; william.garyfallou@quantumdx.com (G.-Z.G.); orlandok2@yahoo.com (O.K.); sametsahin@me.com (S.Ş.)

<sup>2</sup> Department of Chemical and Process Engineering, Faculty of Engineering, Bilecik Şeyh Edebali University, 11230 Bilecik, Turkey

<sup>3</sup> Department of Neuroscience, Psychology and Behaviour, University of Leicester, University Road, Leicester LE1 7RH, UK; eml12@le.ac.uk

<sup>4</sup> Institute of Neuroscience, Faculty of Medical Sciences, Newcastle University, Newcastle upon Tyne NE2 4HH, UK; michael.catt@ncl.ac.uk

\* Correspondence: eileen.yu@ncl.ac.uk

## Supplementary Information

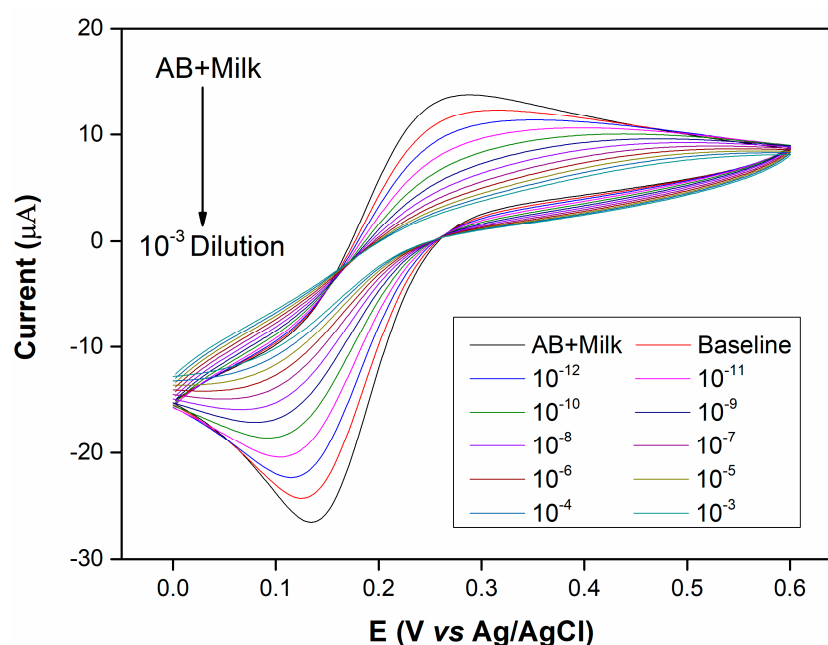

**Figure S1.** CVs (scan rate: 50 mV s<sup>-1</sup>) carried out for the rabbit anti-human IgG covered surface, baseline solution (plain PBS) and increasing plasma concentrations from 10<sup>-12</sup> to 10<sup>-3</sup> 10-fold dilutions of albumin depleted human plasma for the Control (2-a) case. Tested in 10 mM PBS containing 5 mM [Fe (CN)<sub>6</sub>]<sup>4-/3-</sup> and 150 mM NaCl. Electrode surface area: 0.02 cm<sup>2</sup>.

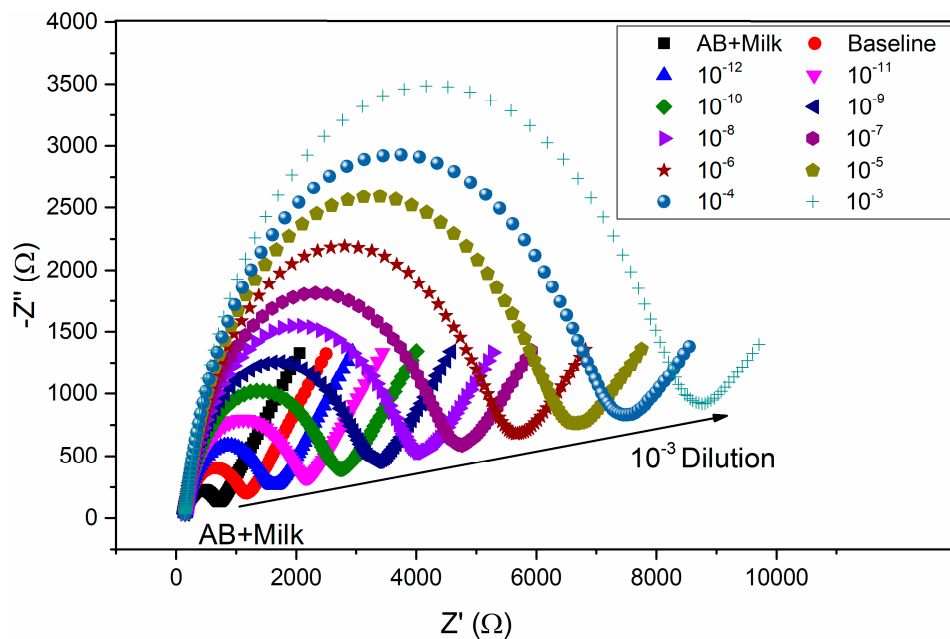

**Figure S2.** EIS (respectively) measurements carried out at OCP of 0.22 mV for the rabbit anti-human IgG covered surface, baseline solution (plain PBS) and increasing plasma concentrations from  $10^{-12}$  to  $10^{-3}$  10-fold dilutions of albumin depleted human plasma for the Control (2-a) case. Inset figure is the electrical equivalent circuit which was used for data fitting and the solid lines represent fitted data.  $R_s$  is solution resistance,  $R_{cys}$  and  $C_{cys}$  are the resistance and capacitance of the cysteamine layer,  $R_{bl}$  is resistance of the biolayer and  $Q_{bl}$  a constant phase element representing the capacitance of the biolayer ( $n > 0.7$  for our data) and  $W$  is the Warburg impedance representing diffusion. EIS test parameters: AC amplitude: 10 mV, frequency range: 0.1 Hz – 10 kHz. Tested in 10 mM PBS containing 5 mM  $[\text{Fe}(\text{CN})_6]^{4-/3-}$  and 150 mM NaCl. Electrode surface area: 0.02 cm<sup>2</sup>.
